# Supplementary material for: Higher proportions of circulating FOXP3+ and CTLA-4+ regulatory T cells are associated with lower fractions of memory CD4+ T cells in infants
Source: PubMed Central journal article supplement — J Leukoc Biol. 2011 Dec;90(6):1133–40. doi: 10.1189/jlb.0511244 (PMC3236549; doi:10.1189/jlb.0511244), 2011-12
Supplement: supp_jlb.0511244_1A0511-244_Rabe_suppl_figs.pdf [file supp_jlb.0511244_1A0511-244_Rabe_suppl_figs.pdf]

## Supplementary Figure 1

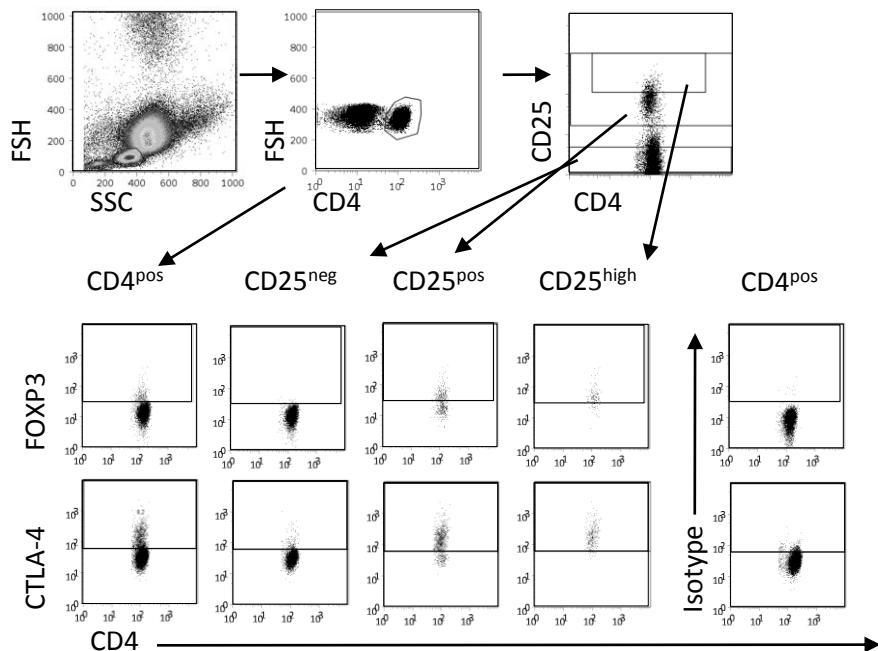

**Supplementary Figure 1. Gating strategies for FOXP3 and CTLA-4 in CD4<sup>+</sup>, CD25<sup>neg</sup>, CD25<sup>+</sup> and CD25<sup>high</sup> T cells.** The lymphocyte population was recognized using forward (FSH) and side (SSC) scatter. Next, CD4<sup>+</sup> lymphocytes were gated followed by the gates for CD25<sup>neg</sup>, CD25<sup>+</sup> and CD25<sup>high</sup> (2% of CD4<sup>+</sup> T cells that expressed high CD25). FOXP3<sup>+</sup> and CTLA-4<sup>+</sup> T cells were identified by comparing the expression of these markers within the CD4<sup>+</sup>, CD25<sup>neg</sup>, CD25<sup>+</sup>, CD25<sup>high</sup> T-cell populations and isotype control and setting the gates accordingly. The representative dot plots are derived from one infant at birth.

## Supplementary Figure 2

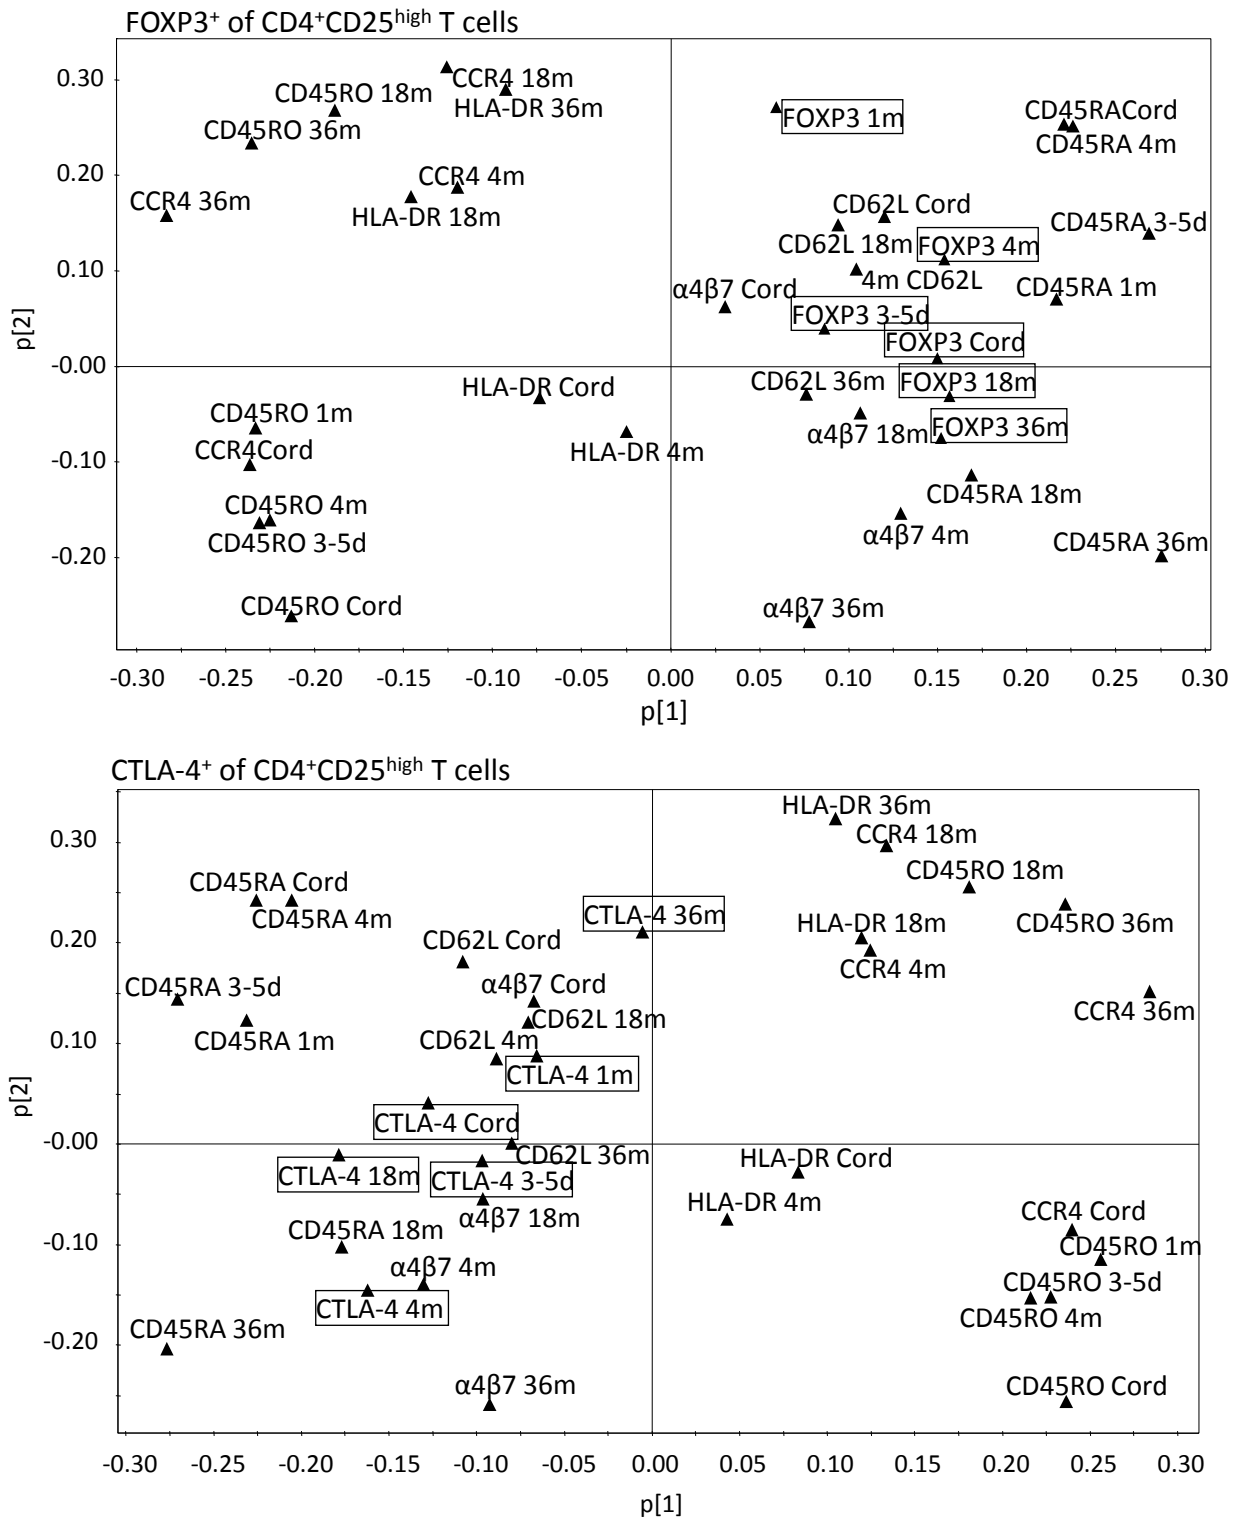

**Supplementary Figure 2. Relationship between FOXP3<sup>+</sup> or CTLA-4<sup>+</sup> T<sub>regs</sub> and expression of memory markers and homing receptors on CD4<sup>+</sup> T cells in blood during infancy.** Principal component analysis (PCA) plot showing an overview of the data set including percentage of FOXP3<sup>+</sup> or CTLA-4<sup>+</sup> T<sub>regs</sub> within the CD4<sup>+</sup>CD25<sup>high</sup> T cells and the fraction of CD4<sup>+</sup> T cells that express CD45RA, CD45RO at birth, 3-5 days, 1, 4, 18 and 36 months and HLA-DR,  $\alpha_4\beta_7$ , CD62L or CCR4 at birth, 4, 18 and 36 months of age.
